# Supplementary material
Source: publisher figshare collection journal article supplement (https://plos.figshare.com/articles/dataset/_/7427306)
Supplement: Supplementary file 1 [file 1]

Archive with 3 entries (3 files):
- pcbi.1006640.s001.pdf
- pcbi.1006640.s002.pdf
- pcbi.1006640.s003.pdf
