# Supplementary material
Source: publisher figshare collection journal article supplement (https://plos.figshare.com/articles/dataset/_/7427306)
Supplement: Supplementary file 1 [file 1 › pcbi.1006640.s001.pdf]

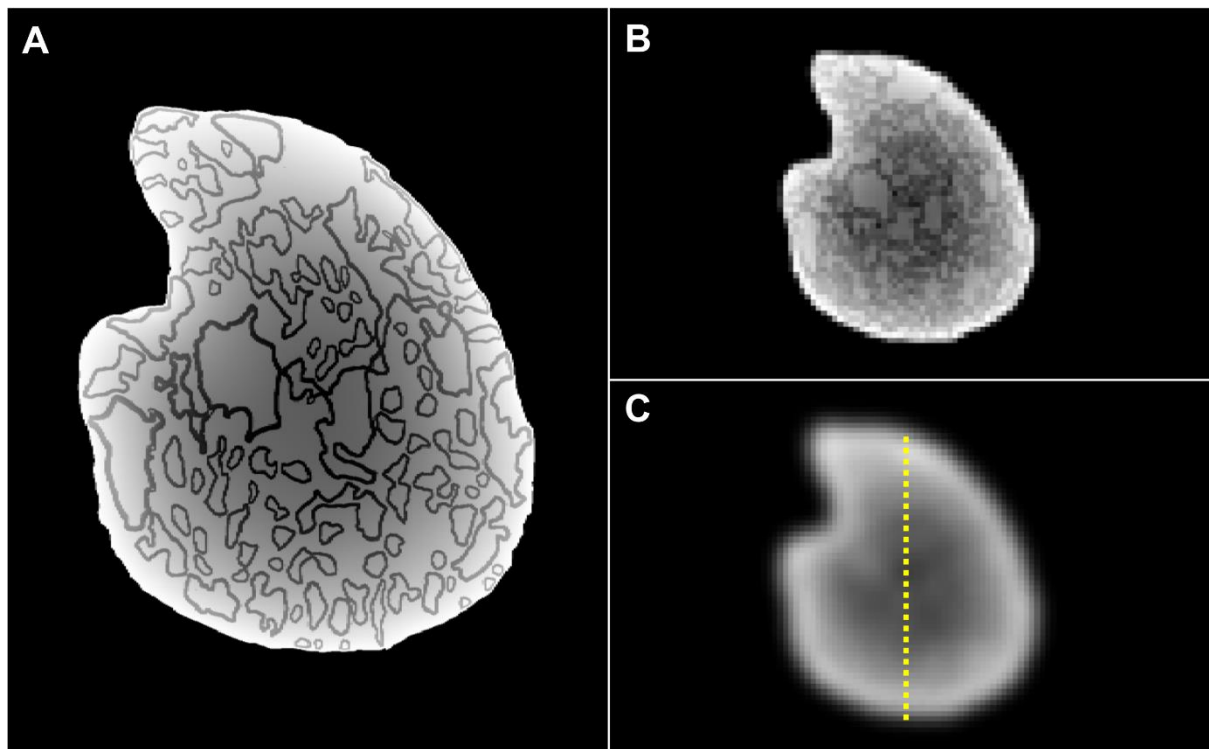

**S1 Fig. Simulation of confocal microscope images from model predicted species distribution.** (A) Model predicted distribution of oxygen in cross section 1 presented in grayscale image. (B) Resolution of the image predicted by the model was reduced by a margin of 5 times. (C) Subsequently we applied a point spread function over the image, followed by application of poison noise, to derive the simulated confocal microscope image at low resolution.
